# Supplementary material for: Assembling oppositely charged lock and key responsive colloids: A mesoscale analog of adaptive chemistry
Source: PubMed Central journal article supplement — Sci Adv. 2017 Sep 15;3(9):e1700321. doi: 10.1126/sciadv.1700321 (PMC5600529; doi:10.1126/sciadv.1700321), 2017-09-15
Supplement: 1700321_SM.pdf [file 1700321_SM.pdf]

## Supplementary Materials for **Assembling oppositely charged lock and key responsive colloids: A mesoscale analog of adaptive chemistry**

Adriana M. Mihut, Björn Stenqvist, Mikael Lund, Peter Schurtenberger, Jérôme J. Crassous

Published 15 September 2017, *Sci. Adv.* **3**, e1700321 (2017)

DOI: 10.1126/sciadv.1700321

### **The PDF file includes:**

- Determination of the entropic contribution for hard lock and key particles
- Evaluation of the binding specificity
- fig. S1. Geometrical configuration of a particle in a lock-and-key assembly.
- fig. S2. Entropic contribution for hard lock and key particles.
- fig. S3. Binding specificity dependence of the mixing ratio between lock and key particles.
- fig. S4. Binding specificity dependence of the temperature at a constant mixing ratio.

### **Other Supplementary Material for this manuscript includes the following:**

(available at [advances.sciencemag.org/cgi/content/full/3/9/e1700321/DC1](http://advances.sciencemag.org/cgi/content/full/3/9/e1700321/DC1))

- movie S1 (.mp4 format). Colloidal molecules with tunable valence via lock-and-key self-assembly.

## Determination of the entropic contribution for hard lock and key particles

In this section, an expression for the excluded volume,  $V_{Ex}$ , experienced by a hard *lock*- particle in the presence of a hard spherical *key*- particle is developed to express the free energy as

$$\Delta G = -T\Delta S = -k_B T \ln \left( \frac{V - V_{Ex}}{V} \right)$$

where  $V = 4\pi R_L^3/3$  is the volume described by the free rotation of the *lock*- particle,  $k_B$ , is the Boltzmann constant and  $T$  the temperature. Considering the *lock and key* geometry described in fig. S1A, we can define the following points: the center of the spherical base-shape of the lock **L**, the center of the cavity of the lock **C**, the center of the key **K**, any point on the rim defined as the circle intersecting the spherical base-shape of the lock and the cavity of the same **R**, and the contact-point between the *lock*- and the *key*- particles **P**. We denote the radius of the base-shape of the *lock*- particle  $R_L$ , the cavity  $R_C$ , and the *key*- particle  $R_K$ . The distance between two arbitrary points **X** and **Y** is denoted  $d_{XY} = |\mathbf{X} - \mathbf{Y}|$  and  $d = d_{LK}$ . In order to express  $\Delta G(d)$ , we need to consider the volume of the spherical cone,  $V_{SC} = V - V_{Ex}$  with radius  $R_L$  and an opening angle equal to twice  $\angle \mathbf{KLC}$ . For this purpose, the angle  $\theta = \angle \mathbf{RCL}$  and

$\psi = \angle \mathbf{RLC}$  have to be derived through

$$\cos(\theta) = \frac{R_C^2 - d_{LC}^2 - R_L^2}{2d_{LC}R_C}$$

$$\cos(\psi) = \frac{R_L^2 - d_{LC}^2 - R_C^2}{2d_{LC}R_L}$$

The spherical cone with radius  $R_C$  and opening angle equal to  $2\theta$  plays a significant role. As schematically depicted for  $R_K < R_L$  in fig. S1B, if the center of the *key*- particle is enclosed by this spherical cone then the *key*- particle may only be in contact with the cavity surface and not the rim. This conditions is fulfilled for  $d < d_{lim}$ , where  $d_{lim} = d_{LK}$  in the case where **R**, **K** and **C** are aligned and the *lock*- and *key*- particles are in contact. However, when it is not enclosed then the key can only be in contact with the rim, if at all. The distance  $d_{LK}$  for the transition between these two states while having a contact-point is defined by

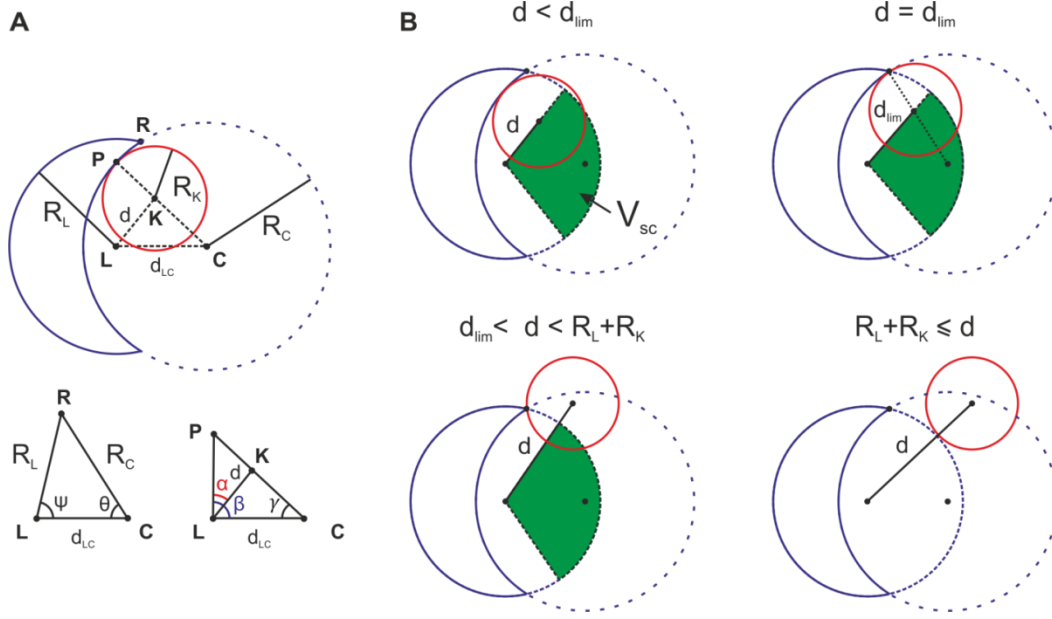

**fig. S1. Geometrical configuration of a particle in a lock-and-key assembly.** (A) Schematic representation of the lock and key geometry, considering a lock- particle defined by two intersecting spheres with radii  $R_L$  and  $R_C$  and a spherical key- particle with a radius  $R_K$ . (B) To illustrate the proposed model in the case that  $R_K < R_L$ , different configurations are depicted as function of the distance  $d$  between the center of the lock- and key- particles. The free energy of the system is here defined by the ratio between the spherical cone volume,  $V_{sc}$ , shown in green, and the volume described by the lock- particle,  $V = 4\pi R_L^3/3$  as discussed in the model.

$$d_{lim} = \begin{cases} \sqrt{(R_C - R_K)^2 + d_{LC}^2 - 2(R_C - R_K)d_{LC}\cos(\theta)}, & R_K \leq R_C \\ R_L\cos(\psi) + \sqrt{R_K^2 - R_L^2\sin^2(\psi)}, & R_C \leq R_K. \end{cases}$$

It is important to note that the minimum value of  $d$  is  $R_K$  when  $R_K \leq R_C$  and  $d_{lim}$  when  $R_K \geq R_C$ .

Furthermore, we need the angle  $\gamma = \angle PCL$  as is described by

$$\cos(\gamma) = f(x) = \begin{cases} \frac{(R_C - R_K)^2 + d_{LC}^2 - d^2}{2(R_C - R_K)d_{LC}}, & \max(d_{LC} - R_C + R_K, 0) \leq d \leq d_{lim} \\ \cos(\psi), & d_{lim} \leq d \end{cases}$$

The ratio between the volume of the spherical cone and the full sphere is

$$\frac{V_{SC}}{V} = \frac{V - V_{Ex}}{V} = \frac{1 - \cos(\beta - \alpha)}{2} = \frac{1}{2} \left( 1 - AB - \sqrt{1 - A^2} \sqrt{1 - B^2} \right)$$

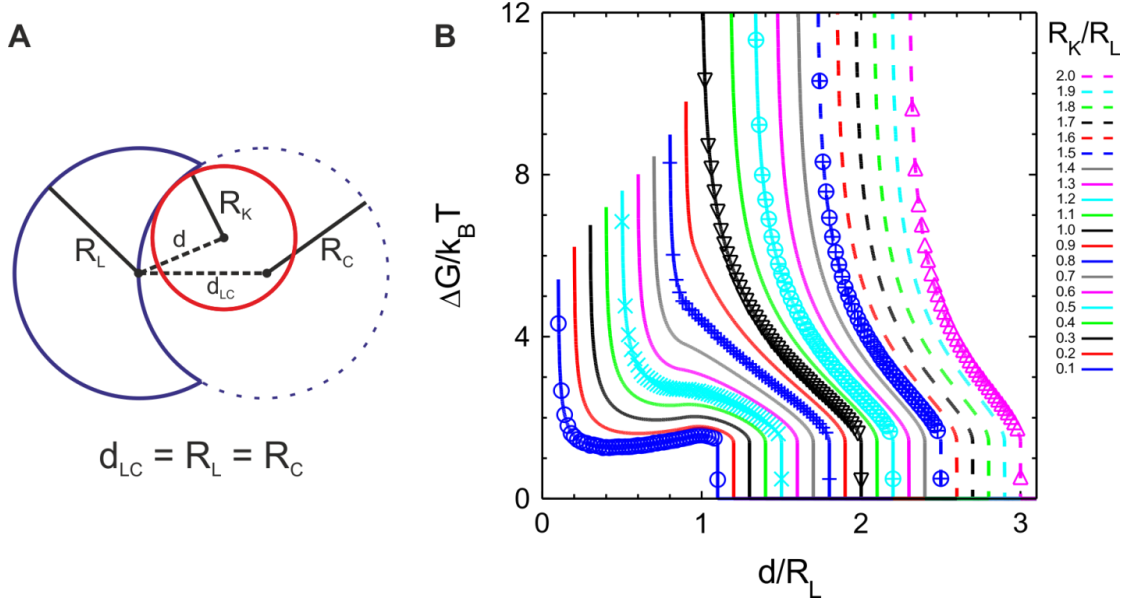

**fig. S2. Entropic contribution for hard lock and key particles.** (A) Schematic representation of the lock and key geometry used in our study where  $d_{LC} = R_L = R_K$ . (B) Calculations of the free energy for different  $R_K/R_L$ - values as a function of the distance between the center of the lock- and key- particles normalized by the radius of the lock-particle. The analytical calculations (lines) are supported by Monte Carlo simulations for some  $R_K/R_L$ - values (symbols) to demonstrate the agreement between the derived analytical expression and simulations.

where  $\alpha = \angle \text{PLK}$  and

$$A = \cos(\alpha) = \frac{d^2 + d_{PL}^2 - R_K^2}{2dd_{PL}}$$

and  $\beta = \angle \text{PLC}$  and

$$B = \cos(\beta) = \frac{d_{LC}^2 + d_{PL}^2 - R_C^2}{2d_{LC}d_{PL}}$$

Here  $d_{PL}$  is described by

$$d_{PL}^2 = d_{LC}^2 + R_C^2 - 2d_{LC}R_C \cos(\gamma)$$

Next, the free energy can be expressed as

$$\Delta G(d) = \begin{cases} 0, & 0 \leq d < -(d_{LC} - R_C + R_K) \\ -k_B T \ln \left( \frac{1 - \cos(\beta - \alpha)}{2} \right), & \max(d_{LC} - R_C + R_K, 0) \leq d \leq R_K + R_L, \quad R_K \leq R_C \\ -k_B T \ln \left( \frac{1 - \cos(\psi - \alpha)}{2} \right), & d_{lim} \leq d, \quad R_C \leq R_K \\ 0, & R_L + R_K < d \end{cases}$$

Note that  $A, B, \alpha, \beta, \gamma$  and  $d_{PL}$  are all functions of  $d$ . Interestingly, this expression as well indicates that in the special case where  $R_C < R_L$  and where the *key*- particle is sufficiently small, the free energy may decay to zero approaching the center of the *lock*- particle.

For our study we have used  $R_C = d_{LC} = R_L$  as is seen in fig. S2A, and thus the free energy simplifies to

$$\Delta G(d) = \begin{cases} -k_B T \ln \left( \frac{(R_K - d)(R_K - 2R_L + d)}{4dR_L} \right), & R_K \leq d \leq \sqrt{R_K^2 - R_K R_L + R_L^2} \\ -k_B T \ln \left( \frac{1}{2} + \frac{1}{2} \cos \left( \frac{\pi}{3} + \arccos \left( \frac{R_K^2 - R_L^2 - d^2}{2dR_L} \right) \right) \right), & \sqrt{R_K^2 - R_K R_L + R_L^2} \leq d \leq R_L + R_K \\ 0, & R_L + R_K < d. \end{cases}$$

The above equation is used to produce the data in fig. S2B. The data have been supported for given  $R_K/R_L$  ratios by Monte Carlo simulations, thus indicating the overall agreement between the two evaluation methods (see fig. S2B).

## Evaluation of the binding specificity

### Dependence of the mixing ratio between *lock*- and *key*- particles

The number of *LK*- contacts per *key*- particle was evaluated in order to demonstrate the high specificity of the *LK*- assembly by analysing 2D confocal micrographs recorded at different locations. The fraction of *key*- particles showing no specific association is defined as  $f(N_0)$ , whereas 1, 2 and 3 *LK*- contacts correspond to  $f(N_1)$ ,  $f(N_2)$  and  $f(N_3)$ , respectively. Hereby, the proportion of the different associations is defined relative to the total number of key□particles visible in the field of view.

Using 2D images the maximum number of *LK*- contacts was considered equal to 3. The influence of the mixing ratio  $N_L/N_K$  at a constant  $c_L$  (1 wt%) referring to the experiments illustrated by Fig. 5 in the main text was first considered. The results of the statistical analysis are summarized in fig. S3. The distributions of contacts are shown at different  $N_L/N_K$ - values in fig. S3, A to C. The error bars correspond to the standard deviation of  $f(N_i)$ , with  $i = 1, 2$  or 3 determined from different micrographs captured at the same magnification. The analysis clearly shows the decrease of the unspecific binding, as well as the increase of number of contact per *key*- particles at higher  $N_L/N_K$ - values. Figure S3D summarizes this finding by showing the dependence of fraction of bound *key*- particles,  $f(N_i)$  for  $i = 1, 2$  and 3, on  $N_L/N_K$ .  $f(N_1)$  was found to decrease whereas  $f(N_2)$  and  $f(N_3)$  increase pointing to the promotion of the specific coordination of the *key*- particles.

This is captured by the increase of the average number of *LK*- bounds per *key*- particles showing at least one specific association defined as  $\langle N_{LK} \rangle = \sum_i (N_i)$  from  $i = 1$  to 3 shown in fig. S3E. Finally, the very high specificity of the assembly is rendered in fig. S3F by the fraction of the *key*- particles presenting at least one *LK*- contact expressed as  $f(N_{LK}) = 1 - f(N_0)$ , the latter increasing from  $\approx 68\%$  to 90% for  $N_L/N_K \approx 1$  to 6.

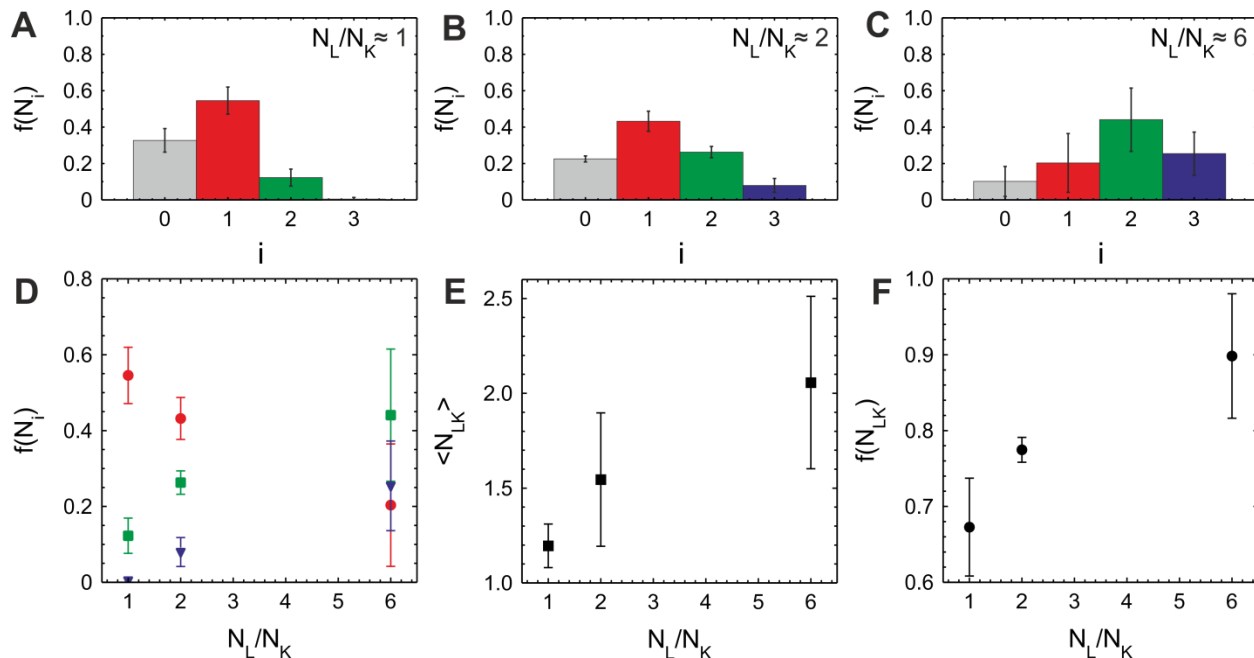

**fig. S3. Binding specificity dependence of the mixing ratio between lock and key particles.** (A-C) Distribution of the number of apparent LK- contacts per key- particle determined from 2D confocal micrographs with increasing  $N_L/N_K$  at a constant lock- particle concentration referring to the experiments shown in Fig. 4 (see text for more details). (D) Summary of the fraction of the key- particles presenting 1, 2 and 3 LK- contacts ( $N_1$ ,  $N_2$  and  $N_3$ ). (E) Average number of apparent LK- contacts per key- particle specifically assembled, i.e., exhibiting at least one specific contact ( $i \leq 1$ ) for the three different mixtures. (F) Fraction of key-particles specifically associated ( $i \geq 1$ ) with increasing  $N_L/N_K$ .

### Dependence of the temperature at a constant mixing ratio

A similar analysis was performed for the temperature dependence of the specificity of the association for  $N_L/N_K \approx 6$  and  $c_L = 1$  wt% in conjunction with the discussion of Fig. 6 in the main text. The analysis, shown in fig. S4, illustrates the possibility to tune the coordination of the *key*- particles with the temperature starting with a relatively broad distribution of  $N_i$  with a larger proportion of  $N_2$  and  $N_3$  at 20°C, which narrows to a majority of  $N_2$  with increasing temperature and more especially after the volume phase transition of the *key*- particles. In parallel, it is worth noting that the specificity of the assembly indicated by  $f(N_{LK})$  increases to almost 100% with increasing temperature that we attribute to the onset of the van der Waals (or hydrophobic) interactions as discussed in Fig. 3 in the main text.

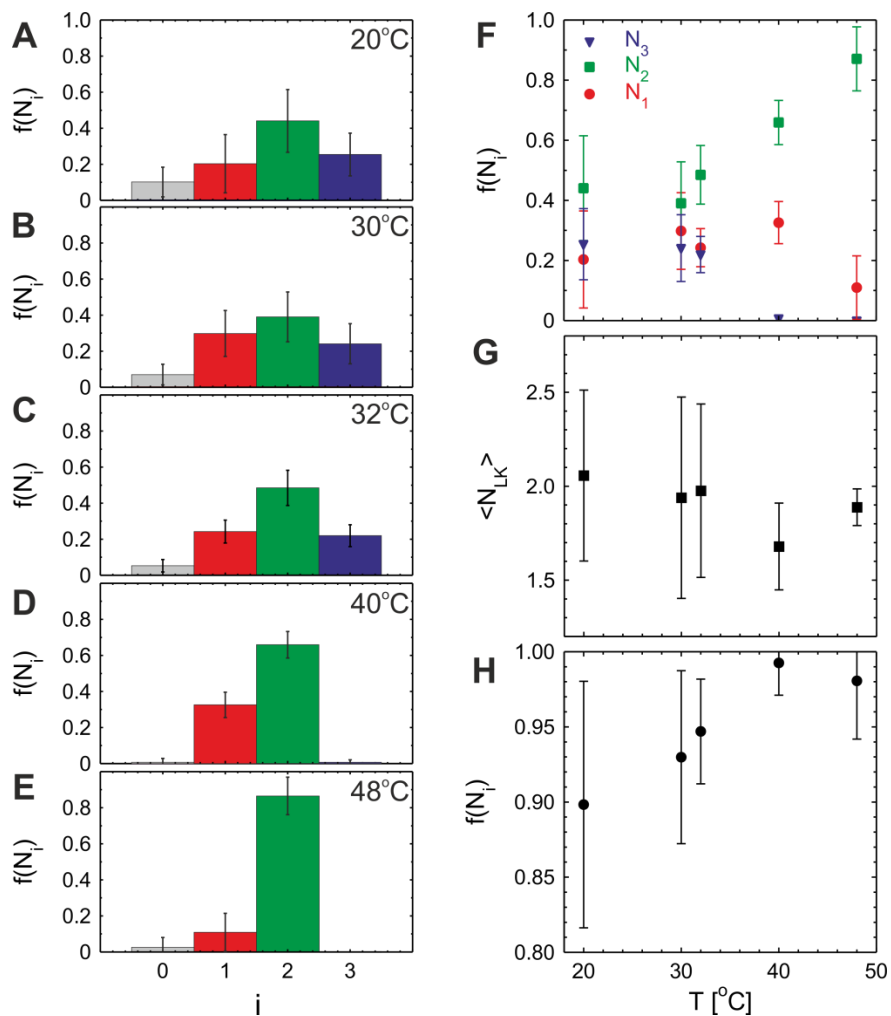

**fig. S4. Binding specificity dependence of the temperature at a constant mixing ratio.** (A-E) Distribution of the number of apparent LK- contacts per key- particle evaluated from 2D confocal micrographs with increasing temperature for  $c_L = 1$  wt% and  $N_L/N_K \approx 6$ . (F) Summary of the evolution of the number of apparent LK- contacts. (G) Average number of apparent LK- contacts per key- particle specifically assembled,  $\langle N_{LK} \rangle$ . (H) Fraction of key- particles specifically associated ( $i \geq 1$ ) with increasing temperature.
